# Supplementary material for: Altered static and dynamic functional connectivity of habenula in first-episode, drug-naïve schizophrenia patients, and their association with symptoms including hallucination and anxiety
Source: Front Psychiatry. 2023 Jan 19;14:1078779. doi: 10.3389/fpsyt.2023.1078779 (PMC9892902; doi:10.3389/fpsyt.2023.1078779)
Supplement: Supplementary file 2 [file Table_1.xlsx]

## Sheet: tSNR
subjects	Hb_L	Hb_R	Hb_L_adjcent csf	Hb_R_adjcent csf
HC071	241.265	285.825	117.664	103.098
HC072	276.949	364.674	166.791	150.575
HC073	352.182	409.38	170.21	130.418
HC074	240.56	367.896	197.874	150.097
HC076	283.818	339.452	193.3	196.074
HC077	245.764	388.017	146.069	127.169
HC078	285.89	310.225	126.162	179.108
HC079	311.78	453.044	128.088	132.35
HC080	191.997	279.592	128.092	132.602
HC081	313.686	342.122	94.6638	91.8455
HC083	337.575	341.931	96.9654	128.301
HC084	329.885	376.787	134.712	136.611
HC085	236.652	326.987	125.778	102.821
HC088	268.131	392.904	179.068	190.654
HC089	312.242	406.488	144.227	156.06
HC090	234.373	355.301	123.455	85.5554
HC091	220.731	279.322	112.124	178.895
HC092	222.366	314.429	199.532	195.915
HC093	214.972	260.017	194.473	101.909
HC094	261.15	351.239	121.007	188.876
HC095	245.724	282.001	132.186	170.257
HC096	320.846	474.068	98.1011	102.307
HC097	266.464	390.818	140.427	163.885
HC099	257.083	367.286	148.979	152.166
HC100	406.263	447.962	130.041	114.19
HC101	358.612	443.219	161.349	168.27
HC102	320.252	352.547	116.459	139.109
HC103	291.065	310.742	160.619	175.405
HC104	217.808	242.203	145.301	173.293
HC108	240.93	347.251	176.269	147.557
HC109	177.704	224.959	64.9991	56.5946
HC112	243.813	329.192	131.335	117.857
HC114	157.623	219.232	120.706	103.939
HC117	195.085	240.316	134.006	168.919
HC118	237.724	265.622	116.647	135.415
HC119	345.564	399.439	134.431	135.67
HC120	257.62	354.278	128.103	140.303
HC121	261.92	342.064	200.312	180.177
HC122	299.324	419.994	150.95	124.799
HC123	183.863	244.789	128.624	118.984
HC124	177.909	210.849	112.006	121.561
HC125	238.143	354.91	147.117	123.774
HC127	175.144	212.434	157.604	120.207
HC128	289.487	378.519	197.751	122.526
HC129	157.521	205.603	157.108	153.571
HC130	279.796	348.831	164.357	161.712
HC131	282.427	388.482	116.393	97.3001
HC132	232.494	377.219	112.767	111.245
HC133	190.746	236.84	111.599	100.956
HC134	162.347	315.927	137.87	101.057
HC135	204.432	268.404	132.705	114.368
HC136	131.565	185.253	75.9145	66.639
HC137	286.494	353.309	149.328	189.926
HC138	288.278	347.571	128.185	123.551
HC139	254.241	298.933	142.751	125.145
HC141	270.882	364.803	134.594	103.716
HC142	271.459	341.846	116.037	102.38
HC143	227.95	352.406	170.128	108.04
HC144	234.155	296.094	133.086	107.83
HC145	279.324	314.526	173.967	118.126
HC146	342.693	399.942	135.388	192.982
HC147	277.653	345.78	135.745	163.571
HC149	187.806	285.966	144.629	155.926
HC150	277.341	459.681	176.64	183.596
HC151	341.876	362.891	123.661	113.764
HC152	249.168	353.774	197.037	102.009
HC153	168.301	277.365	115.718	104.449
HC154	297.083	410.553	164.983	144.304
HC155	181.957	219.268	90.6239	111.688
HC156	257.14	295.248	162.314	145.123
HC157	371.619	504.819	193.154	179.307
HC158	322.692	526.629	121.268	99.0845
HC159	303.092	415.063	165.369	188.951
HC160	233.938	304.694	120.519	109.113
HC161	258.15	381.974	185.376	174.512
HC162	289.161	338.582	106.041	93.7341
HC163	204.057	213.978	127.742	143.008
HC166	229.501	326.907	142.321	105.391
HC167	248.965	372.812	184.208	155.972
HC168	176.445	204.739	144.045	128.835
HC171	223.48	332.517	165.664	102.202
HC172	257.685	403.083	186.203	140.886
HC173	145.797	206.933	170.576	152.381
HC174	283.526	370.158	118.76	162.706
HC175	229.425	260.772	154.226	170.352
HC177	149.883	191.564	108.534	118.142
HC178	182.246	243.532	135.816	132.163
HC179	151.562	254.822	113.996	85.7898
HC180	183.73	188.607	119.651	164.705
HC181	240.97	337.098	77.4226	73.5603
HC182	206.898	250.811	71.8287	89.3008
HC183	239.157	319.174	153.166	154.061
HC184	332.404	408.825	161.415	119.278
HC185	199.139	269.334	132.661	195.896
HC186	274.611	350.947	105.056	192.07
HC187	233.965	300.866	145.136	154.685
HC188	265.104	318.904	144.057	161.728
HC189	220.543	266.329	127.3	154.407
HC190	192.555	246.456	144.103	155.506
HC191	286.794	332.865	194.666	192.314
HC192	132.196	163.789	165.26	141.462
HC193	339.461	457.829	97.1244	101.072
HC194	221.046	229.863	62.9344	70.3645
HC196	185.634	233.623	75.2232	83.1252
HC198	259.047	317.39	147.145	167.111
HC199	268.855	307.643	101.885	136.756
HC200	270.93	308.718	135.53	186.648
HC201	165.503	214.748	117.753	169.942
HC202	188.789	202.091	129.06	154.868
HC203	235.746	247.093	143.141	143.149
HC204	309.172	384.701	166.443	198.696
HC205	160.376	219.09	145.174	125.387
HC206	199.626	248.764	125.719	132.944
HC207	287.983	371.475	189.704	132.868
HC208	258.069	264.17	118.221	131.3
HC209	168.943	177.944	64.695	81.9328
HC210	207.089	272.986	186.246	126.764
HC211	124.001	185.439	101.863	97.035
HC212	299.418	387.079	144.681	112.899
HC213	244.455	268.974	150.107	169.427
HC215	204.529	315.96	135.889	109.205
HC216	270.689	307.711	194.939	151.418
HC217	283.697	400.895	195.627	102.27
HC218	282.674	425.818	196.053	121.229
HC219	323.051	437.608	124.004	156.826
HC220	278.284	404.288	161.662	141.712
HC221	280.032	347.213	160.137	158.083
HC222	252.267	279.548	201.269	114.033
HC223	282.015	388.767	118.218	98.3304
HC224	149.368	214.024	143.539	162.701
HC225	359.886	334.361	116.097	136.102
HC226	227.35	365.883	83.9434	81.7422
HC227	156.625	211.8	86.9618	82.261
HC228	230.548	316.875	178.471	147.778
HC229	182.828	239.306	78.5974	69.4781
HC230	208.71	208.05	101.585	87.327
HC231	209.616	321.08	141.406	162.485
HC232	195.618	274.871	52.8897	66.5644
HC233	126.832	179.007	200.239	171.08
HC234	202.814	275.435	83.2972	72.7592
HC236	196.862	261.331	102.096	110.696
HC237	239.22	305.17	91.4224	98.2387
HC238	197.617	220.459	200.57	113.028
HC239	167.427	187.322	86.2134	109.551
HC240	232.363	362.292	108.096	96.7142
HC241	299.939	412.39	145.149	126.199
HC242	130.83	208.693	61.5057	78.1828
HC243	186.473	265.78	97.7187	99.0697
HC244	164.982	269.784	116.072	167.374
HC245	225.403	280.914	108.886	121.387
HC246	209.255	324.947	150.029	152.895
HC247	129.397	150.242	66.7115	62.734
HC248	174.378	267.687	127.646	102.748
HC249	197.686	363.88	116.776	122.932
HC250	167.922	222.842	75.5276	75.577
HC251	137.874	233.23	190.064	165.208
HC252	260.22	339.425	136.002	151.352
HC253	150.37	185.839	52.7206	78.6732
HC254	162.684	216.949	108.366	195.953
HC255	239.655	357.03	110.197	112.638
HC256	301.692	371.098	166.904	145.169
HC257	141.876	206.728	63.047	68.0033
HC258	144.91	172.852	99.8527	88.2639
HC259	226.473	223.824	129.349	137.73
HC260	230.062	327.083	182.691	104.514
HC261	265.938	400.132	105.563	84.0218
HC262	217.009	287.127	95.3537	127.652
HC263	183.251	263.295	115.623	100.096
HC264	231.195	308.676	102.564	91.7897
HC265	190.321	271.115	170.248	154.269
HC266	338.901	379.845	125.139	113.435
HC267	181.178	238.58	127.889	145.372
HC268	147.686	238.724	112.839	159.904
HC269	189.591	244.186	86.8844	116.955
HC270	183.812	242.634	123.986	159.076
HC271	184.686	292.454	82.1166	77.6698
HC272	232.775	244.518	97.6677	127.534
HC276	222.298	258.868	197.013	194.73
HC277	236.299	291.401	115.689	141.958
HC278	184.503	261.317	167.387	177.847
HC279	262.953	349.392	183.351	158.921
HC280	243.381	264.489	67.7619	60.969
HC282	232.81	275.214	112.07	137.767
HC283	305.606	368.257	93.896	80.2706
HC284	293.869	423.727	176.391	151.965
HC285	243.064	352.092	186.918	160.486
HC286	306.938	306.071	103.083	125.025
HC287	230.834	397.034	191.845	148.262
HC288	365.891	428.906	106.715	158.144
HC289	238.231	309.299	120.243	162.588
HC295	153.298	193.79	119.202	80.5704
HC305	77.0624	93.5049	116.237	130.572
HC306	192.851	229.044	149.034	154.779
HC307	243.534	378.823	171.49	141.666
HC308	157.789	202.658	96.2123	106.708
HC309	237.375	316.813	198.375	122.443
HC310	153.737	217.131	172.129	131.242
HC311	165.395	211.782	84.1775	92.0664
HC312	205.06	326.455	158.726	174.948
SCH_003	268.72	416.768	127.475	149.258
SCH_004	173.933	201.924	115.807	128.807
SCH_005	220.013	312.628	158.88	158.504
SCH_006	279.41	336.171	114.818	116.017
SCH_008	233.165	357.218	112.108	115.53
SCH_009	330.037	435.575	138.361	131.132
SCH_010	181.964	204.872	77.6466	72.1522
SCH_011	144.977	221.969	128.794	133.064
SCH_012	302.993	378.459	114.092	192.213
SCH_014	152.241	216.794	115.914	157.662
SCH_015	137.057	211.678	68.8459	83.4205
SCH_016	321.391	331.066	120.945	150.685
SCH_017	274.573	319.503	145.111	105.085
SCH_018	189.823	191.344	131.166	160.197
SCH_019	371.139	405.418	102.277	106.618
SCH_020	216.442	274.184	84.867	96.9505
SCH_021	242.891	367.523	136.865	142.491
SCH_061	218.136	330.078	138.763	136.833
SCH_063	165.852	270.718	89.3506	89.6476
SCH_064	153.029	192.026	75.9392	82.6832
SCH_065	261.117	373.53	113.08	141.135
SCH_066	270.652	353.903	188.937	186.461
SCH_067	208.507	234.936	120.418	123.137
SCH_068	189.98	217.043	102.682	134.751
SCH_069	214.323	265.158	122.986	112.583
SCH_070	177.677	273.765	93.8986	123.432
SCH_071	333.884	425.425	178.923	162.887
SCH_072	240.548	306.76	107.378	191.86
SCH_073	195.396	307.447	85.1758	91.0144
SCH_074	158.314	217.856	99.1856	104.79
SCH_075	135.041	189.164	72.3122	97.3498
SCH_077	226.493	263.211	133.566	140.205
SCH_078	236.706	344.818	120.621	125.429
SCH_079	214.207	288.734	167.419	197.32
SCH_080	284.861	319.896	124.223	160.457
SCH_082	292.732	363.809	132.794	112.845
SCH_083	265.07	262.063	133.11	131.012
SCH_084	224.861	296.039	124.96	176.585
SCH_085	158.491	265.324	97.7798	97.6126
SCH_089	342.531	382.669	178.229	136.768
SCH_091	204.337	215.673	173.495	198.306
SCH_092	421.283	478.783	147.812	157.995
SCH_093	214.401	281.334	147.72	161.308
SCH_094	190.237	282.672	129.271	143.262
SCH_095	216.943	294.395	114.853	129.953
SCH_097	220.457	316.165	151.683	159.2
SCH_098	266.27	375.302	143.538	117.576
SCH_099	222.836	257.353	193.783	125.464
SCH_100	255.254	370.65	119.347	139.05
SCH_101	363.085	468.956	114.143	95.8242
SCH_102	312.867	380.242	110.202	79.6466
SCH_103	128.676	196.635	68.5741	71.2343
SCH_104	258.642	281.232	197.334	190.507
SCH_105	308.757	436.368	101.686	175.452
SCH_107	301.502	413.894	123.527	126.487
SCH_109	246.731	393.456	125.475	149.651
SCH_110	91.4241	141.184	121.694	100.457
SCH_113	283.756	379.43	144.486	163.786
SCH_114	296.72	277.225	170.875	162.3
SCH_115	314.125	406.445	159.737	158.165
SCH_116	363.345	438.638	198.985	134.669
SCH_117	352.337	531.531	153.56	145.179
SCH_118	294.567	366.419	128.087	165.169
SCH_120	185.661	238.737	108.567	101.407
SCH_121	210.227	281.801	91.3589	103.381
SCH_122	290.366	352.114	105.052	104.774
SCH_124	206.414	328.574	119.293	164.812
SCH_126	242.706	289.784	145.663	169.587
SCH_127	217.783	334.675	132.285	173.128
SCH_128	176.818	278.744	158.956	194.891
SCH_129	264.58	413.525	182.482	104.865
SCH_130	282.369	348.784	156.062	133.047
SCH_131	253.602	427.142	112.135	113.21
SCH_132	176.44	259.041	125.22	137.101
SCH_133	249.963	406.651	142.845	105.497
SCH_134	336.732	414.874	180.705	125.722
SCH_135	341.6	443.711	109.74	114.921
SCH_136	288.336	317.361	110.021	117.126
SCH_137	301.046	402.235	184.449	144.988
SCH_138	210.452	291.724	124.57	117.971
SCH_139	274.327	358.438	126.017	95.9892
SCH_141	245.298	250.957	152.657	168.05
SCH_145	281.903	417.464	153.135	197.958
SCH_146	257.427	355.32	163.347	152.302
SCH_147	240.998	341.598	142.932	129.653
SCH_150	166.716	220.177	113.628	124.619
SCH_152	245.765	315.854	159.268	151.4
SCH_153	223.766	262.081	112.073	91.3142
SCH_154	326.537	443.571	185.833	170.023
SCH_155	147.656	257.44	126.314	120.243
SCH_156	299.826	462.563	179.411	184.233
SCH_157	367.088	432.056	192.438	196.673
SCH_159	209.151	245.089	142.504	170.865
SCH_160	166.344	214.465	141.28	150.152
SCH_161	332.598	422.775	161.344	160.147
SCH_163	282.94	348.632	143.089	166.566
SCH_164	239.833	328.348	147.406	191.21
SCH_165	216.033	261.586	126.655	103.393
SCH_166	309.77	327.699	190.882	190.72
SCH_167	224.042	271.468	132.782	187.009
SCH_169	203.461	347.483	170.013	172.185
SCH_170	278.961	331.352	186.82	164.221
SCH_171	176.588	336.198	175.824	176.826
SCH_172	273.151	368.885	134.49	109.048
SCH_173	195.763	332.306	128.394	175.067
SCH_175	265.845	346.596	180.85	175.953
SCH_176	406.376	485.756	163.191	158.141
SCH_178	327.423	364.913	145.386	193.628
SCH_179	379.41	488.299	190.699	187.708
SCH_180	139.156	158.562	99.5473	124.963
SCH_181	278.788	364.021	121.132	132.711
SCH_182	339.597	450.487	176.039	153.957
SCH_183	277.934	324.864	154.301	152.524
SCH_184	245.316	295.789	89.9724	89.4715
SCH_185	237.685	266.368	162.046	180.201
SCH_186	276.492	339.146	107.604	175.42
SCH_187	287.403	372.266	154.685	159.06
SCH_188	161.644	266.461	87.0011	109.901
SCH_189	342.203	445.784	172.126	191.022
SCH_190	332.309	434.077	128.672	146.642
SCH_191	229.816	364.816	159.461	106.265
SCH_195	185.46	208.845	94.3584	99.459
SCH_196	211.721	240.833	183.46	188.893
SCH_197	231.355	292.123	118.115	116.004
SCH_200	273.993	322.099	173.11	168.014
SCH_201	216.076	274.739	42.1464	44.582
SCH_203	269.024	292.683	192.987	160.1
SCH_204	239.665	290.212	144.118	149.306
SCH_205	271.626	350.28	200.572	127.643
SCH_206	296.1	409.95	112.837	110.643
SCH_208	249.673	332.078	133.84	131.522
SCH_209	232.775	375.317	187.796	154.101
SCH_210	325.753	443.929	180.882	194.607
SCH_211	320.439	404.732	113.06	140.356
SCH_212	244.374	350.464	80.2701	106.129
SCH_213	307.258	354.732	156.322	180.293
SCH_214	252.473	383.618	167.084	149.887
SCH_215	286.375	345.095	153.035	192.573
SCH_217	369.359	484.799	105.534	150.225
SCH_218	273.049	388.323	183.263	159.037
SCH_219	311.921	398.992	160.739	168.598
SCH_221	234.799	302.564	136.605	137.006
SCH_223	231.313	417.127	149.459	114.923
SCH_225	448.468	618.949	105.634	148.202
SCH_226	278.843	329.948	63.5917	61.4762
SCH_228	170.276	205.946	62.684	59.5357
SCH_229	296.144	417.402	112.327	130.469
SCH_232	330.457	481.617	76.4315	76.7863
SCH_235	263.247	398.818	132.082	110.476
SCH_236	309.349	399.237	96.8916	80.8235
SCH_237	282.648	400.19	118.045	107.94
SCH_241	310.093	458.49	119.936	137.25
SCH_244	168.614	235.75	131.117	159.707
SCH_245	175.825	234.369	73.3745	61.762
SCH_246	301.202	393.142	94.9425	85.176
SCH_249	268.705	400.872	167.738	186.137
SCH_250	155.18	237.157	115.228	124.74
SCH_253	274.291	348.726	137.429	155.71
SCH_257	263.191	373.137	130.834	103.993
SCH_261	365.838	578.412	144.705	196.661
SCH_262	330.628	448.615	149.896	177.349
SCH_266	352.693	492.895	149.111	136.189
SCH_267	188.14	248.712	99.233	70.6545
SCH_268	177.737	270.063	165.851	142.855
SCH_270	307.404	482.674	178.999	133.782
SCH_302	206.814	365.233	180.538	100.351
SCH_303	249.271	384.301	149.64	187.276
SCH_304	177.303	261.846	124.46	111.216
SCH_310	247.635	347.134	176.95	166.448
SCH_312	174.892	226.92	108.99	129.575
SCH_315	232.919	299.608	105.752	130.599
SCH_317	173.445	296.276	84.8238	100.297
SCH_320	232.219	265.198	137.356	132.825
SCH_323	240.577	321.999	186.468	161.342
SCH_327	251.573	415.707	110.251	116.863
SCH_330	274.996	382.615	124.794	120.056
SCH_334	305.694	371.877	143.598	172.406
SCH_335	349.154	422.958	114.519	137.577
SCH_337	216.562	273.636	134.385	133.952
SCH_340	216.526	264.359	141.006	178.147
SCH_342	278.343	435.982	189.965	148.899
SCH_343	225.009	367.024	154.654	128.625
SCH_346	188.55	215.51	86.6093	95.7272
SCH_347	315.466	319.875	130.276	183.716
SCH_348	288.612	364.638	155.867	187.719
SCH_356	149.771	202.354	137.351	129.367
SCH_359	363.979	484.499	128.405	155.504
SCH_360	338.069	537.753	163.237	176.663
SCH_378	179.057	266.901	116.372	125.584
SCH_384	165.098	229.973	76.5011	78.1569
SCH_386	212.885	215.626	149.843	171.486
SCH_389	201.75	239.45	137.058	176.809
SCH_390	216.937	255.571	115.586	114.137
SCH_391	199.985	236.142	138.34	117.768
SCH_392	304.853	417.757	126.538	177.184
SCH_393	196.185	229.407	110.862	116.044
SCH_395	393.766	368.53	140.317	160.508
SCH_410	361.573	444.733	108.29	195.278
mean	244.176	321.362	134.257	135.173
